# Supplementary material for: High performance Cu/Cu2O nanohybrid electrocatalyst for nonenzymatic glucose detection
Source: Royal Society of Chemistry journal article supplement (doi:10.1039/c6tb01158f), 2016-01-01
Supplement: c6tb01158f1.pdf [file c6tb01158f1.pdf]

## Supporting Information

### High Performance Cu/Cu<sub>2</sub>O Nanohybrid Electrocatalyst for Nonenzymatic Glucose Detection

Xiqing Cheng,<sup>ab</sup> Jun Zhang,<sup>b</sup> Hucheng Chang,<sup>b</sup> Liqiang Luo,<sup>a</sup> Fuqiang Nie<sup>b</sup> and Xinjian Feng<sup>\*bc</sup>

<sup>a</sup> Department of Chemistry, College of Science, Shanghai University, Shanghai, 200444, P. R. China

<sup>b</sup> Suzhou Institute of Nano-Tech and Nano-Bionics, Chinese Academy of Sciences, Suzhou, 215123, P. R. China

<sup>c</sup> College of Chemistry, Chemical Engineering and Materials Science, Soochow University, Suzhou 215123, P. R. China. \*E-mail: xjfeng@suda.edu.cn

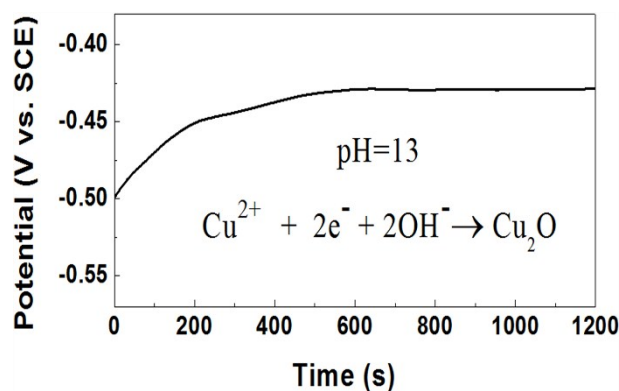

**Fig. S1** Potential-time curve at an applied current density of  $-0.5 \text{ mA cm}^{-2}$  in a stirred solution of 0.3 M Cu (II) and 3 M lactate with pH value of 13.

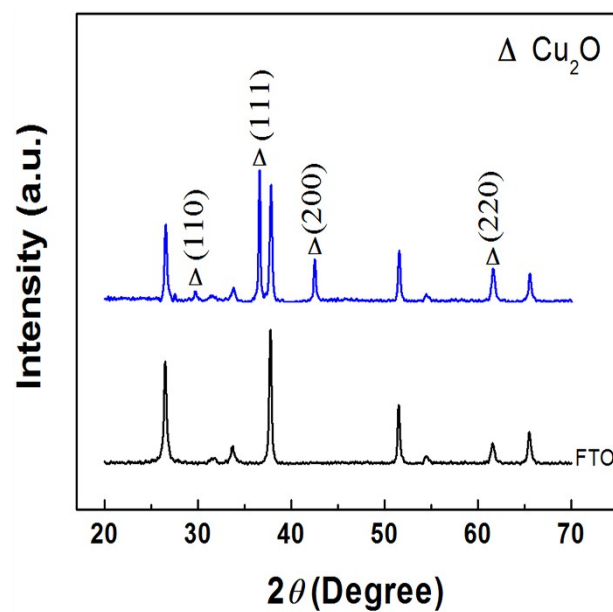

**Fig. S2** XRD of the as-prepared samples at  $-0.5 \text{ mA cm}^{-2}$  for 1 h in electrolyte with pH value of 13.

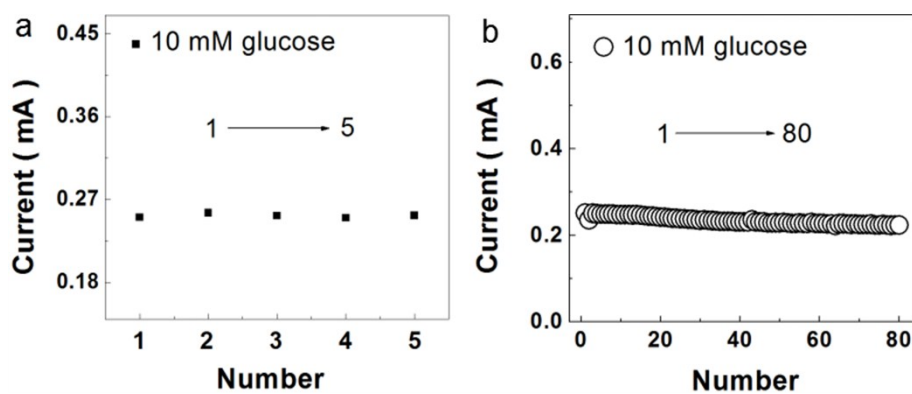

**Fig. S3** The reproducibility of five  $\text{Cu}/\text{Cu}_2\text{O}$  modified electrodes (a) and stability (b) with 80 times consecutively measurements in 0.1 M NaOH with addition of 10 mM glucose at an applied potential of 0.5 V.
